# Supplementary material for: Syntheses, supramolecular structures, magnetic and photochromic properties of six lanthanide complexes based on the 5-azotetrazolyl salicylic acid ligand
Source: Royal Society of Chemistry journal article supplement (doi:10.1039/c4ra09951f), 2014-01-01
Supplement: c4ra09951f1.pdf [file c4ra09951f1.pdf]

## Electronic Supplementary Information

### Syntheses, Structures, Photochromic and Magnetic Properties of Seven Lanthanide Complexes Based on 5-Azotetrazolyl Salicylic Acid Ligand

Wen-Bin Chen, Zhi-Xin Li, Zhi-Jian Ouyang, Wen-Ning Lin, Liu Yang and Wen Dong\*

School of Chemistry and Chemical Engineering, Guangzhou Key Laboratory for Environmentally Functional Materials and Technology, Guangzhou University, Guangzhou, 510006, China

#### Electronic Supplementary Information – Table of Contents

1. **Table S1-6 Cartesian coordinates of  $\pi$ - $\pi$  staking interaction in 1-6.**
2. **Table S7 The results of  $\pi$ - $\pi$  staking interaction energies calculation of 1-6.**
3. **Figure S1 The diagram of hydrogen bonds in 1.**
4. **Figure S2 The diagram of hydrogen bonds in 2.**
5. **Figure S3 The crystal structure of 3.**
6. **Figure S4 The diagram of hydrogen bonds in 4.**
7. **Figure S5 The crystal structure of 5.**
8. **Figure S6 The diagram of hydrogen bonds in 6.**
9. **Figure S7 Plots of  $\chi_M^{-1}$  vs. T for 6.**
10. **Figure S8 UV-vis spectra of 2-6 in alkaline aqueous solution**
11. **Figure S9 Difference-map plots of the azotetrazolyl rings for 1-5.**

**Table S1** Cartesian coordinates of  $\pi$ - $\pi$  staking interaction in **1**.

|               | X           | Y           | Z           |
|---------------|-------------|-------------|-------------|
| N(Fragment=1) | 1.98040000  | 7.44020000  | 21.26570000 |
| N(Fragment=1) | 1.24120000  | 6.89410000  | 19.30610000 |
| N(Fragment=1) | 3.27330000  | 6.27980000  | 18.23920000 |
| O(Fragment=1) | 9.91950000  | 5.40770000  | 16.20080000 |
| O(Fragment=1) | 9.44400000  | 6.02510000  | 18.27470000 |
| O(Fragment=1) | 8.06590000  | 4.86620000  | 14.51550000 |
| H(Fragment=1) | 8.83920000  | 4.93700000  | 14.78020000 |
| N(Fragment=1) | 0.90940000  | 7.34950000  | 20.52150000 |
| N(Fragment=1) | 3.03910000  | 7.04400000  | 20.54950000 |
| C(Fragment=1) | 7.22650000  | 5.22640000  | 15.49170000 |
| C(Fragment=1) | 7.65340000  | 5.61180000  | 16.77220000 |
| C(Fragment=1) | 9.09660000  | 5.68890000  | 17.12700000 |
| N(Fragment=1) | 4.51230000  | 6.34310000  | 18.45710000 |
| C(Fragment=1) | 5.34400000  | 5.95380000  | 17.39830000 |
| C(Fragment=1) | 2.54770000  | 6.72100000  | 19.35940000 |
| C(Fragment=1) | 5.85610000  | 5.22940000  | 15.17910000 |
| H(Fragment=1) | 5.57400000  | 4.97720000  | 14.32850000 |
| C(Fragment=1) | 4.94130000  | 5.59940000  | 16.11140000 |
| H(Fragment=1) | 4.03760000  | 5.61570000  | 15.89000000 |
| C(Fragment=1) | 6.69280000  | 5.95480000  | 17.71010000 |
| H(Fragment=1) | 6.95920000  | 6.19110000  | 18.56830000 |
| H(Fragment=1) | 0.63333350  | 6.72332188  | 18.53064327 |
| H(Fragment=1) | 10.24285932 | 5.73301323  | 18.71979450 |
| N(Fragment=2) | 7.58820000  | 8.17640000  | 14.02180000 |
| N(Fragment=2) | 8.32740000  | 8.72250000  | 15.98140000 |
| N(Fragment=2) | 6.29530000  | 9.33680000  | 17.04830000 |
| O(Fragment=2) | -0.35090000 | 10.20890000 | 19.08670000 |
| O(Fragment=2) | 0.12460000  | 9.59150000  | 17.01280000 |
| O(Fragment=2) | 1.50270000  | 10.75040000 | 20.77200000 |
| H(Fragment=2) | 0.72940000  | 10.67960000 | 20.50730000 |
| N(Fragment=2) | 8.65920000  | 8.26710000  | 14.76610000 |
| N(Fragment=2) | 6.52950000  | 8.57250000  | 14.73800000 |
| C(Fragment=2) | 2.34220000  | 10.39020000 | 19.79580000 |
| C(Fragment=2) | 1.91530000  | 10.00480000 | 18.51540000 |
| C(Fragment=2) | 0.47210000  | 9.92770000  | 18.16050000 |
| N(Fragment=2) | 5.05640000  | 9.27340000  | 16.83040000 |
| C(Fragment=2) | 4.22460000  | 9.66280000  | 17.88920000 |
| C(Fragment=2) | 7.02090000  | 8.89550000  | 15.92810000 |
| C(Fragment=2) | 3.71260000  | 10.38720000 | 20.10840000 |
| H(Fragment=2) | 3.99470000  | 10.63940000 | 20.95900000 |
| C(Fragment=2) | 4.62740000  | 10.01710000 | 19.17610000 |
| H(Fragment=2) | 5.53110000  | 10.00090000 | 19.39750000 |

|               |             |            |             |
|---------------|-------------|------------|-------------|
| C(Fragment=2) | 2.87590000  | 9.66180000 | 17.57740000 |
| H(Fragment=2) | 2.60950000  | 9.42550000 | 16.71920000 |
| H(Fragment=2) | -0.68748597 | 9.86192792 | 16.57807581 |

**Table S2** Cartesian coordinates of  $\pi$ - $\pi$  staking interaction in **2**.

|               | X          | Y           | Z           |
|---------------|------------|-------------|-------------|
| O(Fragment=1) | 4.73250187 | -0.30559854 | 1.93769976  |
| C(Fragment=1) | 5.65630187 | -1.14829854 | 1.90749976  |
| C(Fragment=1) | 6.22210187 | -1.65929854 | 3.18849976  |
| C(Fragment=1) | 5.62250187 | -1.26979854 | 4.36529976  |
| H(Fragment=1) | 4.87920187 | -0.71269854 | 4.33609976  |
| C(Fragment=1) | 6.10930187 | -1.69559854 | 5.59249976  |
| C(Fragment=1) | 7.35720187 | -2.50519854 | 3.23999976  |
| C(Fragment=1) | 7.23380187 | -2.52779854 | 5.62529976  |
| H(Fragment=1) | 7.56810187 | -2.81339854 | 6.44379976  |
| C(Fragment=1) | 7.84460187 | -2.92509854 | 4.47539976  |
| H(Fragment=1) | 8.59060187 | -3.47859854 | 4.51519976  |
| N(Fragment=1) | 4.53120187 | -0.60899854 | 6.79879976  |
| N(Fragment=1) | 5.56300187 | -1.33849854 | 6.84109976  |
| O(Fragment=1) | 8.00590187 | -2.91569854 | 2.15479976  |
| H(Fragment=1) | 7.65070187 | -2.59839854 | 1.48709976  |
| C(Fragment=1) | 4.04180187 | -0.28019854 | 8.06789976  |
| N(Fragment=1) | 4.50280187 | -0.68729854 | 9.23929976  |
| N(Fragment=1) | 2.99510187 | 0.54590146  | 8.18499976  |
| N(Fragment=1) | 2.80120187 | 0.64400146  | 9.49529976  |
| N(Fragment=1) | 3.69790187 | -0.08939854 | 10.12409976 |
| O(Fragment=1) | 6.14890187 | -1.61279854 | 0.84059976  |
| H(Fragment=1) | 4.32846397 | 0.10169591  | 1.16798254  |
| O(Fragment=2) | 3.21149813 | 3.83869854  | 8.77950024  |
| O(Fragment=2) | 3.82849813 | 3.85519854  | 10.86770024 |
| C(Fragment=2) | 4.05229813 | 3.54499854  | 9.66280024  |
| C(Fragment=2) | 5.32439813 | 2.83529854  | 9.32900024  |
| C(Fragment=2) | 5.64319813 | 2.55039854  | 8.02460024  |
| H(Fragment=2) | 5.05369813 | 2.78789854  | 7.34540024  |
| C(Fragment=2) | 6.83839813 | 1.91059854  | 7.70370024  |
| C(Fragment=2) | 6.21639813 | 2.46629854  | 10.34070024 |
| C(Fragment=2) | 7.71159813 | 1.52319854  | 8.73180024  |
| H(Fragment=2) | 8.49959813 | 1.07479854  | 8.52690024  |
| C(Fragment=2) | 7.40639813 | 1.80259854  | 10.02460024 |
| H(Fragment=2) | 7.99199813 | 1.55169854  | 10.70260024 |
| N(Fragment=2) | 8.19179813 | 1.26279854  | 6.02380024  |
| N(Fragment=2) | 7.04529813 | 1.69309854  | 6.33540024  |
| O(Fragment=2) | 5.96269813 | 2.71119854  | 11.63560024 |

|               |             |            |             |
|---------------|-------------|------------|-------------|
| H(Fragment=2) | 5.20359813  | 3.00909854 | 11.71310024 |
| C(Fragment=2) | 8.34009813  | 1.07669854 | 4.64400024  |
| N(Fragment=2) | 7.44889813  | 1.32929854 | 3.69700024  |
| N(Fragment=2) | 9.48679813  | 0.62949854 | 4.14890024  |
| H(Fragment=2) | 10.19459813 | 0.40599854 | 4.58200024  |
| N(Fragment=2) | 8.07599813  | 1.02299854 | 2.56500024  |
| N(Fragment=2) | 9.29829813  | 0.60599854 | 2.83490024  |
| H(Fragment=2) | 2.33918404  | 4.20409896 | 8.94427480  |

**Table S3** Cartesian coordinates of  $\pi$ - $\pi$  staking interaction in **3**.

|               | X          | Y           | Z          |
|---------------|------------|-------------|------------|
| O(Fragment=1) | 7.43150000 | -2.78690000 | 5.14920000 |
| O(Fragment=1) | 7.02060000 | -0.88390000 | 6.21270000 |
| O(Fragment=1) | 7.66460000 | -2.78740000 | 2.55210000 |
| H(Fragment=1) | 7.82260000 | -3.11920000 | 3.28620000 |
| N(Fragment=1) | 7.47720000 | 2.74520000  | 2.65220000 |
| N(Fragment=1) | 7.33960000 | 3.33360000  | 3.76650000 |
| N(Fragment=1) | 7.43460000 | 5.45930000  | 2.50710000 |
| N(Fragment=1) | 7.34050000 | 6.71860000  | 2.93800000 |
| N(Fragment=1) | 7.11170000 | 6.73530000  | 4.21920000 |
| N(Fragment=1) | 7.10580000 | 5.49710000  | 4.71970000 |
| C(Fragment=1) | 7.42670000 | -0.80950000 | 3.89130000 |
| C(Fragment=1) | 7.62990000 | -1.45440000 | 2.65800000 |
| C(Fragment=1) | 7.75730000 | -0.69310000 | 1.50170000 |
| H(Fragment=1) | 7.88380000 | -1.12180000 | 0.68630000 |
| C(Fragment=1) | 7.69910000 | 0.67320000  | 1.53650000 |
| H(Fragment=1) | 7.77670000 | 1.15850000  | 0.74720000 |
| C(Fragment=1) | 7.52470000 | 1.34330000  | 2.74510000 |
| C(Fragment=1) | 7.38850000 | 0.57430000  | 3.87670000 |
| H(Fragment=1) | 7.26250000 | 1.01330000  | 4.68630000 |
| C(Fragment=1) | 7.27050000 | -1.52320000 | 5.18400000 |
| C(Fragment=1) | 7.31270000 | 4.72950000  | 3.62860000 |
| H(Fragment=1) | 6.95593656 | -1.48721615 | 6.95662760 |
| O(Fragment=2) | 4.13680000 | 6.73110000  | 5.62510000 |
| O(Fragment=2) | 3.81380000 | 8.28210000  | 4.11470000 |
| O(Fragment=2) | 3.78700000 | 7.71370000  | 1.65400000 |
| H(Fragment=2) | 3.49990000 | 8.16410000  | 2.27640000 |
| N(Fragment=2) | 4.12310000 | 2.39650000  | 3.11650000 |
| N(Fragment=2) | 3.91300000 | 1.52330000  | 2.21980000 |
| N(Fragment=2) | 3.83380000 | -0.84850000 | 1.95720000 |
| H(Fragment=2) | 3.67700000 | -0.85340000 | 1.11140000 |
| N(Fragment=2) | 3.95520000 | -1.87660000 | 2.74220000 |

|               |            |             |            |
|---------------|------------|-------------|------------|
| N(Fragment=2) | 4.21010000 | -1.48340000 | 3.97540000 |
| N(Fragment=2) | 4.23850000 | -0.14250000 | 3.98560000 |
| C(Fragment=2) | 3.97220000 | 6.02570000  | 3.34720000 |
| C(Fragment=2) | 3.85090000 | 6.40070000  | 2.02980000 |
| C(Fragment=2) | 3.84650000 | 5.44040000  | 1.00400000 |
| H(Fragment=2) | 3.79540000 | 5.70940000  | 0.11460000 |
| C(Fragment=2) | 3.91640000 | 4.12000000  | 1.31160000 |
| H(Fragment=2) | 3.89200000 | 3.48020000  | 0.63690000 |
| C(Fragment=2) | 4.02460000 | 3.72270000  | 2.66090000 |
| C(Fragment=2) | 4.05970000 | 4.68830000  | 3.64460000 |
| H(Fragment=2) | 4.14590000 | 4.42800000  | 4.53250000 |
| C(Fragment=2) | 3.98400000 | 7.03830000  | 4.41070000 |
| C(Fragment=2) | 4.01640000 | 0.20520000  | 2.72620000 |
| H(Fragment=2) | 4.17277952 | 7.35481181  | 6.35399578 |

**Table S4** Cartesian coordinates of  $\pi$ - $\pi$  staking interaction in **4**.

|               | X           | Y          | Z           |
|---------------|-------------|------------|-------------|
| O(Fragment=1) | 10.28780000 | 4.84980000 | 1.17500000  |
| C(Fragment=1) | 10.43400000 | 4.87690000 | -0.06270000 |
| C(Fragment=1) | 10.37170000 | 3.57700000 | -0.81420000 |
| C(Fragment=1) | 10.28260000 | 2.33860000 | -0.21610000 |
| C(Fragment=1) | 10.24090000 | 1.16140000 | -1.00620000 |
| H(Fragment=1) | 10.23960000 | 0.32530000 | -0.59910000 |
| C(Fragment=1) | 10.19980000 | 1.26270000 | -2.37410000 |
| H(Fragment=1) | 10.17880000 | 0.49510000 | -2.89800000 |
| C(Fragment=1) | 10.19000000 | 2.50550000 | -2.96650000 |
| N(Fragment=1) | 10.09290000 | 2.74090000 | -4.40000000 |
| N(Fragment=1) | 9.75940000  | 1.70500000 | -5.05310000 |
| C(Fragment=1) | 9.69170000  | 1.92910000 | -6.43560000 |
| N(Fragment=1) | 9.77910000  | 2.73520000 | -8.28780000 |
| N(Fragment=1) | 10.10240000 | 3.10620000 | -7.08100000 |
| H(Fragment=1) | 10.45070000 | 3.83240000 | -6.78000000 |
| N(Fragment=1) | 9.33500000  | 1.51670000 | -8.39870000 |
| N(Fragment=1) | 9.25550000  | 0.97170000 | -7.25940000 |
| C(Fragment=1) | 10.27970000 | 3.61700000 | -2.23140000 |
| H(Fragment=1) | 10.28230000 | 4.44170000 | -2.66070000 |
| O(Fragment=1) | 10.31680000 | 2.21300000 | 1.12970000  |
| H(Fragment=1) | 10.50400000 | 2.93780000 | 1.46730000  |
| O(Fragment=1) | 10.71850000 | 5.90700000 | -0.73800000 |
| H(Fragment=1) | 10.79051674 | 6.66397970 | -0.15200058 |

|               |            |            |              |
|---------------|------------|------------|--------------|
| O(Fragment=2) | 5.97420000 | 1.30840000 | -8.33890000  |
| C(Fragment=2) | 6.38600000 | 2.29290000 | -8.97080000  |
| C(Fragment=2) | 6.69080000 | 3.57130000 | -8.31960000  |
| C(Fragment=2) | 6.99960000 | 4.89680000 | -6.35360000  |
| C(Fragment=2) | 7.07470000 | 5.94840000 | -8.48460000  |
| H(Fragment=2) | 7.18130000 | 6.71460000 | -9.00070000  |
| C(Fragment=2) | 7.15530000 | 6.02690000 | -7.14750000  |
| H(Fragment=2) | 7.31770000 | 6.85020000 | -6.74520000  |
| C(Fragment=2) | 6.83670000 | 4.74700000 | -9.09040000  |
| N(Fragment=2) | 7.15440000 | 5.16790000 | -4.98080000  |
| N(Fragment=2) | 6.96670000 | 4.18060000 | -4.31510000  |
| C(Fragment=2) | 7.16230000 | 4.55010000 | -2.89700000  |
| N(Fragment=2) | 7.68250000 | 5.65160000 | -2.33650000  |
| N(Fragment=2) | 6.87420000 | 3.69690000 | -1.99020000  |
| N(Fragment=2) | 7.62880000 | 5.41910000 | -0.92610000  |
| N(Fragment=2) | 7.12830000 | 4.21630000 | -0.76210000  |
| C(Fragment=2) | 6.75180000 | 3.65270000 | -6.96520000  |
| H(Fragment=2) | 6.63280000 | 2.89070000 | -6.44520000  |
| O(Fragment=2) | 6.78230000 | 4.77560000 | -10.39950000 |
| H(Fragment=2) | 6.74870000 | 4.00940000 | -10.68900000 |
| O(Fragment=2) | 6.63440000 | 2.21730000 | -10.23750000 |
| H(Fragment=2) | 5.86794689 | 0.56548396 | -8.93755352  |

**Table S5** Cartesian coordinates of  $\pi$ - $\pi$  staking interaction in **5**.

|               | X          | Y           | Z           |
|---------------|------------|-------------|-------------|
| N(Fragment=1) | 3.41260087 | 8.71140078  | 12.17629988 |
| N(Fragment=1) | 2.94130087 | 9.84390078  | 12.21209988 |
| N(Fragment=1) | 2.66400087 | 10.39800078 | 10.99289988 |
| N(Fragment=1) | 3.48860087 | 8.36610078  | 10.82379988 |
| C(Fragment=1) | 2.37760087 | 10.70060078 | 4.71149988  |
| C(Fragment=1) | 2.18540087 | 11.95950078 | 3.96859988  |
| C(Fragment=1) | 2.47040087 | 10.65380078 | 6.11429988  |
| H(Fragment=1) | 2.45220087 | 11.47220078 | 6.55669988  |
| C(Fragment=1) | 2.99680087 | 9.44600078  | 10.17949988 |
| C(Fragment=1) | 2.62180087 | 8.32070078  | 4.66609988  |
| H(Fragment=1) | 2.63190087 | 7.51650078  | 4.19949988  |
| C(Fragment=1) | 2.57770087 | 9.61650078  | 6.84559988  |
| C(Fragment=1) | 2.44310087 | 9.44170078  | 3.98019988  |
| C(Fragment=1) | 2.78290087 | 8.28520078  | 5.93939988  |
| H(Fragment=1) | 3.02170087 | 7.48520078  | 6.34899988  |
| O(Fragment=1) | 2.34450087 | 11.99650078 | 2.72819988  |

|               |            |             |             |
|---------------|------------|-------------|-------------|
| O(Fragment=1) | 2.41490087 | 9.36220078  | 2.65669988  |
| H(Fragment=1) | 2.53460087 | 10.10670078 | 2.33599988  |
| N(Fragment=1) | 2.64060087 | 9.80690078  | 8.19709988  |
| N(Fragment=1) | 2.89150087 | 8.80240078  | 8.93419988  |
| O(Fragment=1) | 1.83700087 | 13.01950078 | 4.69119988  |
| H(Fragment=1) | 1.68043066 | 13.90036485 | 4.34311332  |
| N(Fragment=2) | 5.56279913 | 11.37269922 | 4.66800012  |
| N(Fragment=2) | 5.83809913 | 11.14679922 | 5.94130012  |
| H(Fragment=2) | 6.18079913 | 10.45059922 | 6.31130012  |
| N(Fragment=2) | 5.01489913 | 13.24119922 | 5.68720012  |
| N(Fragment=2) | 5.82529913 | 11.42959922 | 8.53810012  |
| N(Fragment=2) | 5.06999913 | 12.66709922 | 4.58110012  |
| N(Fragment=2) | 5.48349913 | 12.47109922 | 8.00000012  |
| C(Fragment=2) | 6.12549913 | 10.60399922 | 12.20150012 |
| C(Fragment=2) | 6.34939913 | 9.28829922  | 12.85930012 |
| C(Fragment=2) | 6.04239913 | 10.57559922 | 10.82290012 |
| H(Fragment=2) | 6.12639913 | 9.78279922  | 10.34270012 |
| C(Fragment=2) | 5.81659913 | 11.85719922 | 10.16020012 |
| C(Fragment=2) | 5.99539913 | 11.75489922 | 12.81880012 |
| C(Fragment=2) | 5.93949913 | 12.92719922 | 10.60550012 |
| H(Fragment=2) | 6.04249913 | 13.67599922 | 10.06260012 |
| C(Fragment=2) | 5.92079913 | 13.02949922 | 12.05750012 |
| H(Fragment=2) | 5.86699913 | 13.85219922 | 12.48740012 |
| C(Fragment=2) | 5.42219913 | 12.34319922 | 6.52480012  |
| O(Fragment=2) | 6.18419913 | 9.27549922  | 14.13940012 |
| O(Fragment=2) | 6.09139913 | 11.89419922 | 14.17420012 |
| H(Fragment=2) | 6.19349913 | 11.15669922 | 14.51810012 |
| O(Fragment=2) | 6.64669913 | 8.32489922  | 12.24490012 |
| H(Fragment=2) | 6.82407949 | 7.46022344  | 12.62235476 |

**Table S6** Cartesian coordinates of  $\pi$ - $\pi$  staking interaction in **6**.

|               | X           | Y          | Z           |
|---------------|-------------|------------|-------------|
| O(Fragment=1) | 3.12160000  | 0.20360000 | 16.91510000 |
| O(Fragment=1) | 2.40980000  | 1.62180000 | 18.44050000 |
| O(Fragment=1) | -0.26610000 | 2.12770000 | 18.16960000 |
| N(Fragment=1) | 0.81440000  | 1.58940000 | 12.77560000 |
| N(Fragment=1) | -0.09690000 | 1.77160000 | 11.91500000 |
| N(Fragment=1) | -0.42900000 | 1.86470000 | 9.57160000  |
| N(Fragment=1) | 0.34760000  | 1.63420000 | 8.49800000  |
| N(Fragment=1) | 1.55020000  | 1.28160000 | 8.87770000  |
| N(Fragment=1) | 1.61540000  | 1.26980000 | 10.21700000 |

|               |             |             |             |
|---------------|-------------|-------------|-------------|
| C(Fragment=1) | 1.21670000  | 1.47140000  | 16.39930000 |
| C(Fragment=1) | -0.01640000 | 1.98410000  | 16.89530000 |
| C(Fragment=1) | -1.01220000 | 2.31750000  | 15.93470000 |
| H(Fragment=1) | -1.83930000 | 2.62320000  | 16.22850000 |
| C(Fragment=1) | -0.78630000 | 2.20080000  | 14.59740000 |
| H(Fragment=1) | -1.45220000 | 2.44510000  | 13.99590000 |
| C(Fragment=1) | 0.43770000  | 1.71570000  | 14.12070000 |
| C(Fragment=1) | 1.41290000  | 1.35610000  | 15.03410000 |
| H(Fragment=1) | 2.22380000  | 1.02690000  | 14.72170000 |
| C(Fragment=1) | 2.29870000  | 1.06000000  | 17.30640000 |
| C(Fragment=1) | 0.38500000  | 1.63350000  | 10.60430000 |
| H(Fragment=1) | 3.74742309  | -0.20924008 | 17.51469031 |
| H(Fragment=1) | 0.56115006  | 2.18224468  | 18.65362709 |
| O(Fragment=2) | -2.66610000 | 6.69770000  | 8.19860000  |
| O(Fragment=2) | -1.95420000 | 5.27950000  | 6.67320000  |
| O(Fragment=2) | 0.72170000  | 4.77360000  | 6.94420000  |
| N(Fragment=2) | -0.35890000 | 5.31190000  | 12.33820000 |
| N(Fragment=2) | 0.55240000  | 5.12970000  | 13.19880000 |
| N(Fragment=2) | 0.88460000  | 5.03660000  | 15.54220000 |
| N(Fragment=2) | 0.10800000  | 5.26710000  | 16.61580000 |
| N(Fragment=2) | -1.09460000 | 5.61970000  | 16.23610000 |
| N(Fragment=2) | -1.15990000 | 5.63150000  | 14.89670000 |
| C(Fragment=2) | -0.76120000 | 5.42990000  | 8.71450000  |
| C(Fragment=2) | 0.47200000  | 4.91720000  | 8.21850000  |
| C(Fragment=2) | 1.46780000  | 4.58380000  | 9.17910000  |
| H(Fragment=2) | 2.29490000  | 4.27810000  | 8.88530000  |
| C(Fragment=2) | 1.24190000  | 4.70050000  | 10.51640000 |
| H(Fragment=2) | 1.90780000  | 4.45620000  | 11.11790000 |
| C(Fragment=2) | 0.01780000  | 5.18560000  | 10.99310000 |
| C(Fragment=2) | -0.95740000 | 5.54520000  | 10.07970000 |
| H(Fragment=2) | -1.76830000 | 5.87440000  | 10.39210000 |
| C(Fragment=2) | -1.84320000 | 5.84130000  | 7.80740000  |
| C(Fragment=2) | 0.07060000  | 5.26780000  | 14.50950000 |
| H(Fragment=2) | 1.84477374  | 4.75791494  | 15.52217426 |
| H(Fragment=2) | -3.46687259 | 6.63569708  | 7.67274936  |
| H(Fragment=2) | -0.00261607 | 4.70304637  | 6.31811022  |



**Table S7.** The results of  $\pi$ - $\pi$  stacking interaction energies calculation of **1–6**

| Complex | $E_{(AB)}/\text{au}$ | $E_{(A,bAB)}/\text{au}$ | $E_{(B,bAB)}/\text{au}$ | $E(\text{interaction energy})/\text{au}$ |
|---------|----------------------|-------------------------|-------------------------|------------------------------------------|
| 1       | -1717.0425180152     | -858.77940345448        | -858.25693688521        | -0.00618767551                           |
| 2       | -1717.0363826789     | -858.26447490954        | -858.58697888269        | -0.0152409855                            |
| 3       | -1717.0240094382     | -858.26074907947        | -858.75162610811        | -0.01163425062                           |
| 4       | -1716.970376836      | -858.72553264745        | -858.22907352354        | -0.01577151261                           |
| 5       | -1716.7332350464     | -858.13083206516        | -858.58697888269        | -0.0152409855                            |
| 6       | -1717.1229962244     | -858.29552568186        | -858.81494581191        | -0.01252473063                           |

$$E(\text{interaction energy}) = E_{(AB)} - (E_{(A,bAB)} + E_{(B,bAB)})$$

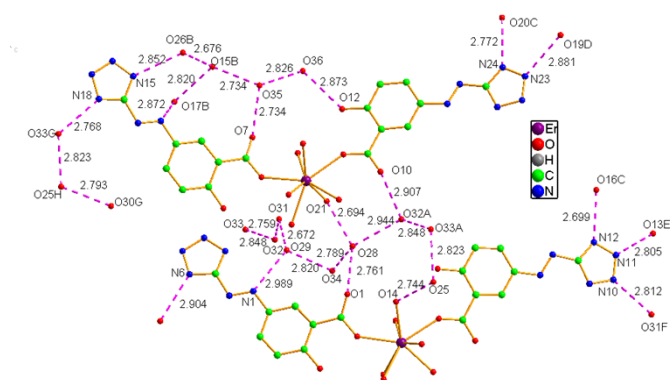**Figure S1** The diagram of hydrogen bonds in **1**. (Symmetry codes: A=1-x,1-y,1-z; B=x, y, -1+z; C=-1+x, y, z; D=-x,-y, 1-z; E=-x,1-y, 2-z; F=1-x, y,1+z; G=2-x,1-y, -z; H=1+x,1y, -1+z.)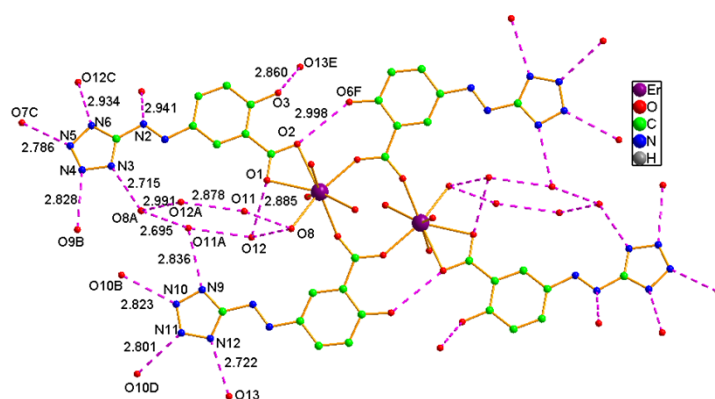**Figure S2** The diagram of hydrogen bonds in **2**. (Symmetry codes: A=1-x,1-y,2-z; B=1-x,1-y,1-z; C=-x,1-y,1-z; D=x,y, 1+z; E=-1+x,y,-1+z; F=1-x,-y,-z.)

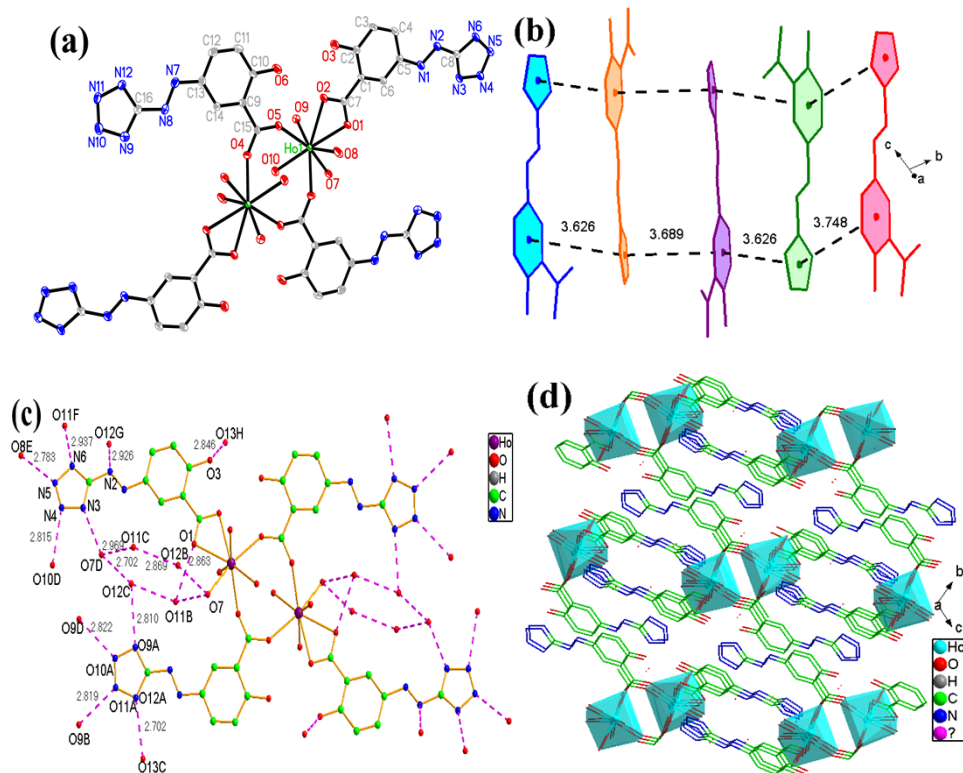

**Figure S3** (a) ORTEP view (30% thermal ellipsoids) of **3**, all H atoms and lattice water molecules have been omitted for clarity, (b) the  $\pi$ - $\pi$  stacking interaction in **3**, (c) the diagram of hydrogen bonds in **3**. (Symmetry codes: A=1-x,1-y,2-z; B=x,y,1+z; C=1-x,1-y,2-z; D=1-x,1-y,3-z; E=-x,1-y,3-z; F=-x,1-y,2-z; G=-1+x,y,1+z; H=-x,1-y,1-z.) (d) the 3D supramolecular structure of **3**.

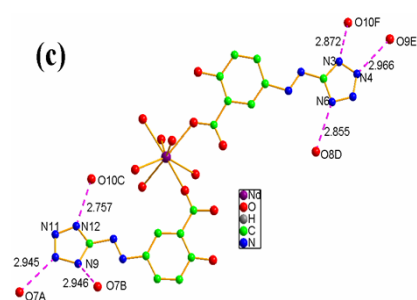

**Figure S4** The diagram of hydrogen bonds in **4**. (Symmetry codes: A=0.5+x,-0.5+y,1+z; B=0.5+x,-0.5-y,0.5+z; C= x,-y,0.5+z; D= x,y,-1+z; E=-0.5+x,0.5-y,-1.5+z; F=-0.5+x,0.5+y,-1+z.)

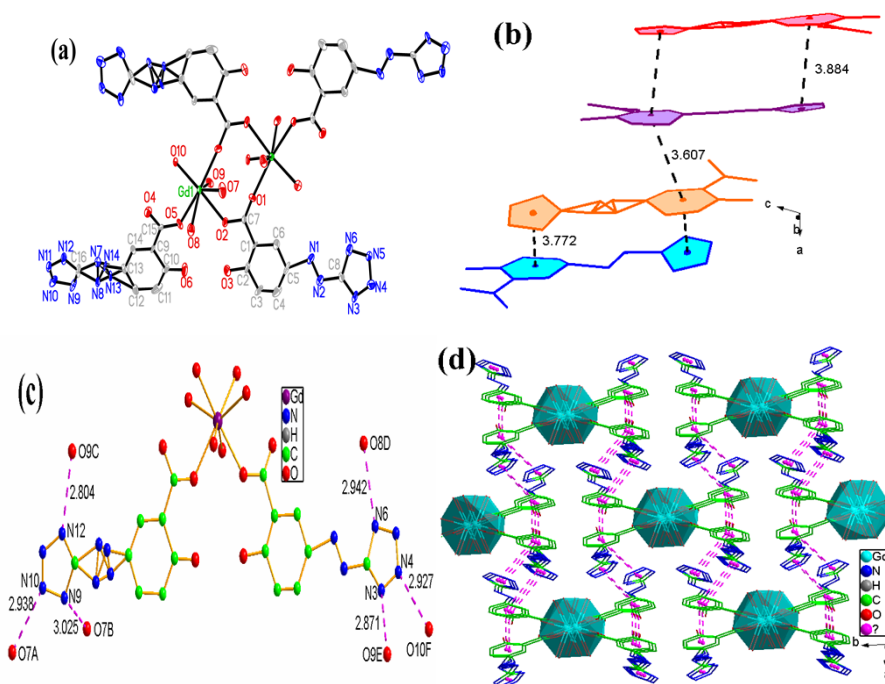

**Figure S5** (a) ORTEP view (30% thermal ellipsoids) of **5**, all H atoms have been omitted for clarity, (b) the  $\pi$ - $\pi$  stacking interaction in **5**, (c) the diagram of hydrogen bonds in **5** (Symmetry codes: A=0.5+x,0.5-y,1.5+z; B=0.5+x,0.5+y,1+z; C=x,y,1+z; D=x,y,-1+z; E=-0.5+x,0.5+y,-1+z; F=-0.5+x,0.5-y,-1.5+z), (d) the 3D supramolecular structure showing the  $\pi$ - $\pi$  stacking interaction.

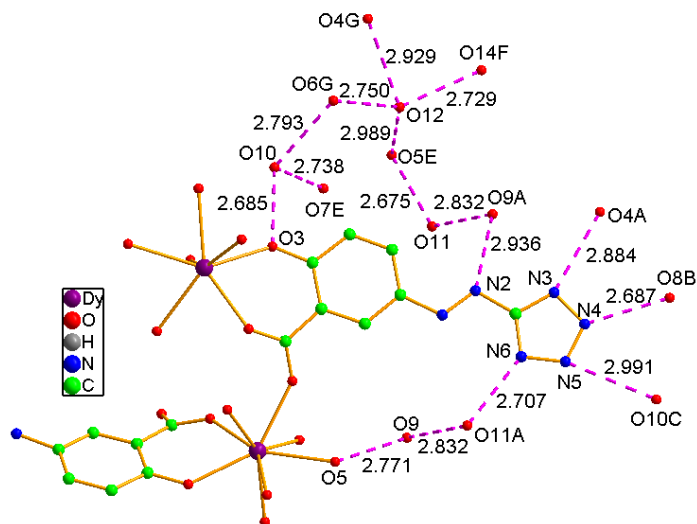

**Figure S6** The diagram of hydrogen bonds in **6** (Symmetry codes: A=1-x,1-y,2-z; B=1+x,1.5-y,0.5+z; C=x,1.5-y,0.5+z; D=1+x,y,z; E=1+x,y,1+z; F=1+x,1+y,z)

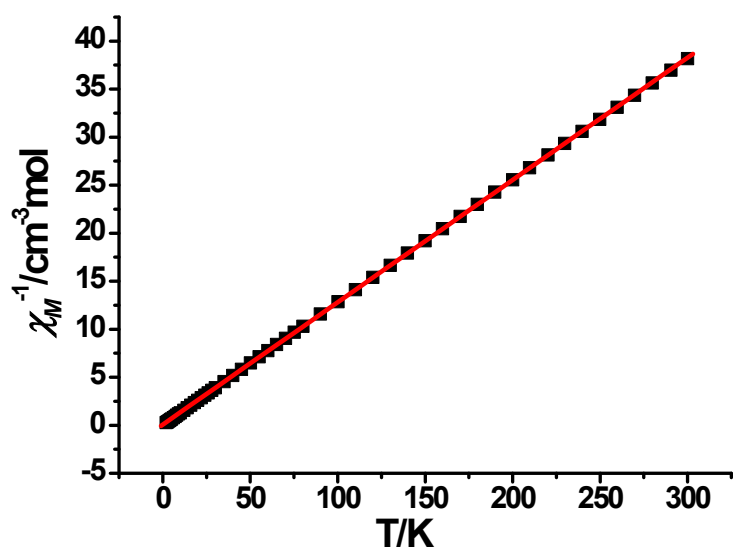

Figure S7. Plots of  $\chi_M^{-1}$  vs. T for **6**. The red lines represent the fitting results.

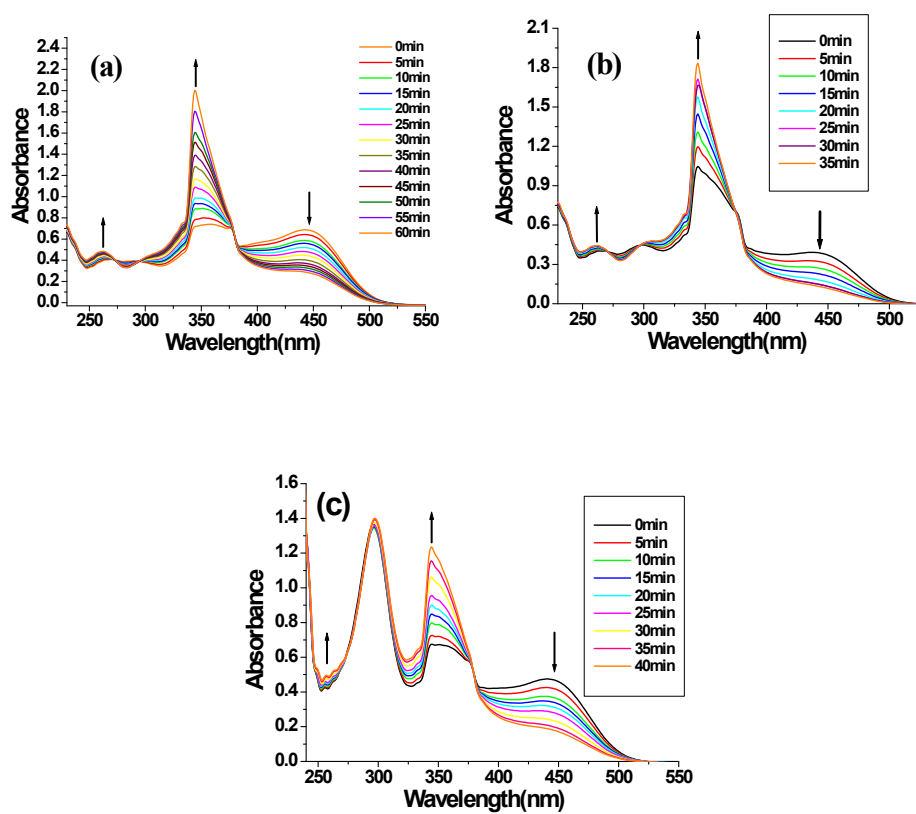

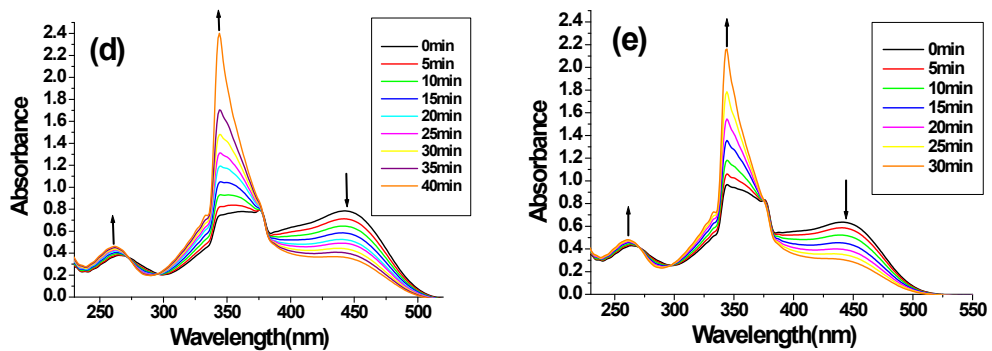

**Figure S8** (a)–(e) UV-vis spectral change of 2–6 in alkaline aqueous solution with the concentration of  $2.0 \times 10^{-5} \text{ mol}\cdot\text{L}^{-1}$  upon repeated irradiation at 365 nm at 5 min interval at room temperature.

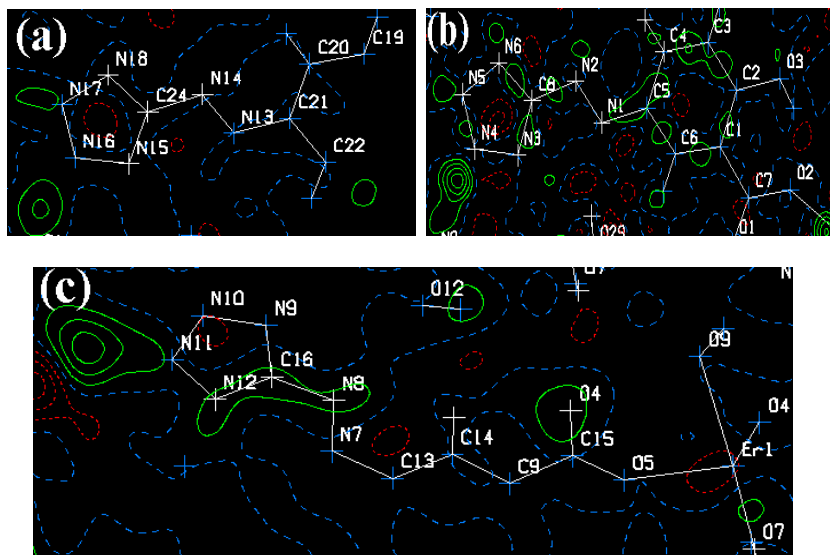

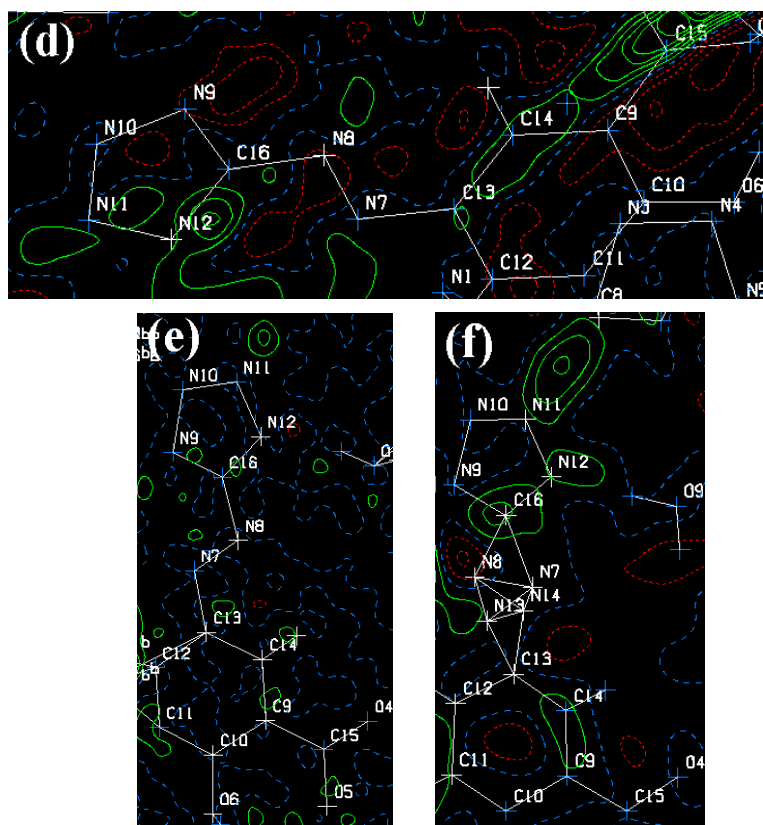

**Figure S9.** (a) and (b) Difference-map plots of the azotetrazolyl rings for complex **1**.(c)-(f) Difference-map plots of the azotetrazolyl rings for complexes **2-5**, respectively.
